# Supplementary material for: Determinants of Mammographic Breast Density by Race Among a Large Screening Population
Source: PubMed Central journal article supplement (PMC7192029; doi:10.1093/jncics/pkaa010), 2020-02-26
Supplement: pkaa010_supplementary_data.pdf [file pkaa010_supplementary_data.pdf]

## SUPPLEMENTARY MATERIALS

### Supplementary Methods

To estimate the total variance in mammographic density explained by each explanatory variable, we calculated generalized  $R^2$  values using the Cox & Snell (1989) method [20] (See

**Supplemental Table 1**). This model follows the equation:

$$R^2_{Cox \& Snell} = 1 - \exp \left\{ \frac{-2[\log L(\beta) - \log L(0)]}{n} \right\}$$

, where  $L(0)$  is the likelihood of the intercept-only model,  $L(\beta)$  is the likelihood of the specified model (i.e., model with explanatory variable(s)), and  $n$  is the sample size. The  $R^2_{Cox \& Snell}$  cannot attain a value of 1, therefore we used the Nagelkerke (1991) adjustment to obtain “Max-rescaled  $R^2$ ” values using the following formula:

$$R^2_{Nagelkerke} = \frac{1 - \exp \left\{ \frac{-2[\log L(\beta) - \log L(0)]}{n} \right\}}{1 - \exp \left\{ \frac{-2[\log L(0)]}{n} \right\}}$$

[21]. We present the  $R^2$  values for both the Cox & Snell (1989) and the adjusted Nagelkerke (1991) in Supplemental Table 1 below.

Supplementary Table 1: Results for  $R^2$  (presented as percentages) values for independently fit models and full models using the polytomous logistic regression.

| Variable / Model           | Overall*             |                    | African American†    |                    | White‡               |                    |
|----------------------------|----------------------|--------------------|----------------------|--------------------|----------------------|--------------------|
|                            | $R^2_{Cox \& Snell}$ | $R^2_{Nagelkerke}$ | $R^2_{Cox \& Snell}$ | $R^2_{Nagelkerke}$ | $R^2_{Cox \& Snell}$ | $R^2_{Nagelkerke}$ |
| Race                       | 2.1                  | 2.3                | -                    | -                  | -                    | -                  |
| Parity/ age at first birth | 3.3                  | 3.7                | 1.5                  | 1.7                | 3.0                  | 3.4                |
| Age Group                  | 3.0                  | 3.3                | 2.4                  | 2.8                | 3.8                  | 4.3                |
| BMI                        | 23.2                 | 26.2               | 19.5                 | 22.2               | 23.2                 | 26.2               |
| BMI at age 18              | 8.5                  | 9.5                | 6.7                  | 7.7                | 8.8                  | 9.9                |
| Age at menarche            | 0.8                  | 0.9                | 0.5                  | 0.6                | 1.0                  | 1.2                |
| FHOBC                      | 0.1                  | 0.2                | 0.1                  | 0.1                | 0.2                  | 0.2                |
| Current alcohol use        | 1.5                  | 1.7                | 0.3                  | 0.3                | 1.6                  | 1.8                |
| Oral contraceptive use     | 1.2                  | 1.3                | 0.4                  | 0.4                | 1.1                  | 1.3                |
| Post-menopausal status     | 2.7                  | 3.1                | 1.7                  | 1.9                | 3.8                  | 4.2                |
| Ever HRT§                  | 0.6                  | 0.6                | 0.1                  | 0.1                | 0.4                  | 0.5                |
| Age at menopause§          | 0.1                  | 0.1                | 0.1                  | 0.1                | 0.1                  | 0.1                |
| Full Models§               | 24.6                 | 28.1               | 21.1                 | 24.3               | 24.8                 | 28.5               |
| Full Model                 | 29.3                 | 33.1               | 25.1                 | 28.6               | 29.7                 | 33.6               |

\* Model among 37,839 women from the Joanne Knight Breast Health Center (BHC) at Siteman Cancer Center. Fully adjusted model contains includes: race, parity and age at first birth, age group, BMI, BMI at age 18, age at menarche, family history of breast cancer, alcohol use, history of oral contraceptive use, menopausal status. Models among post-menopausal women only further adjusted ever HRT and age at menopause (among post-menopausal women only,  $N = 26,914$ ). † Model among 14,673 African American Women. Fully adjusted model includes: parity and age at first birth, age group, BMI, BMI at age 18, age at menarche, family history of breast cancer, alcohol use, history of oral contraceptive use, menopausal status. Models among post-menopausal women only further adjusted ever HRT and age at menopause (among post-menopausal women only,  $N = 10,287$ ). ‡ Model among 23,166 Non-Hispanic White Women. Fully adjusted model includes: parity and age at first birth, age group, BMI, BMI at age 18, age at menarche, family history of breast cancer, alcohol use, history of oral contraceptive use, menopausal status. Models among post-menopausal women only further adjusted ever HRT and age at menopause (among post-menopausal women only,  $N = 16,627$ ). § Among postmenopausal women only. The Cox & Snell and Nagelkerke  $R^2$  values are derived using the maximum likelihood function from the fitted models of the polytomous logistic regression models. The Nagelkerke  $R^2$  is the “max rescaled”  $R^2$ . They are analogous to the  $R^2$  values derived from the ordinary least squares regression when using linear regression.

Supplementary Table 2: Multivariable polytomous logistic regression\* for the association of participant characteristics with mammographic density (referent outcome is almost entirely fatty), among 37,839 women. Model performed with covariates with missing categorized.

| Variable                            | No.†   | Extremely Dense   |                    | Heterogeneously Dense |                    | Scattered Fibroglandular Tissue |                    | Almost Entirely Fatty (Referent) |
|-------------------------------------|--------|-------------------|--------------------|-----------------------|--------------------|---------------------------------|--------------------|----------------------------------|
|                                     |        | (%‡) or Mean (SD) | OR (95% CI)        | (%‡) or Mean (SD)     | OR (95% CI)        | (%‡) or Mean (SD)               | OR (95% CI)        | (%‡) or Mean (SD)                |
| (%)                                 |        | 1597 (4.2)        |                    | 10,630 (29.1)         |                    | 20,686 (54.7)                   |                    | 4926 (13.0)                      |
| Race                                |        |                   |                    |                       |                    |                                 |                    |                                  |
| White                               | 23166  | 5.0               | 1.00 (Referent)    | 31.9                  | 1.00 (Referent)    | 52.7                            | 1.00 (Referent)    | 10.3                             |
| African American                    | 14673  | 2.9               | 1.26 (1.07 – 1.49) | 22.0                  | 0.91 (0.83 – 0.99) | 57.8                            | 0.89 (0.82 – 0.96) | 17.3                             |
| Parity / age at first child's birth |        |                   |                    |                       |                    |                                 |                    |                                  |
| Nulliparous                         | 4243   | 7.1               | 1.00 (Referent)    | 33.4                  | 1.00 (Referent)    | 47.1                            | 1.00 (Referent)    | 12.4                             |
| 1 – 4 children, <25 years           | 17,043 | 2.6               | 0.38 (0.31 – 0.48) | 23.9                  | 0.63 (0.55 – 0.73) | 58.8                            | 0.93 (0.81 – 1.06) | 14.7                             |
| 1 – 4 children, 25 – 29 years       | 6438   | 4.5               | 0.52 (0.41 – 0.66) | 32.1                  | 0.81 (0.68 – 0.95) | 52.9                            | 0.98 (0.84 – 1.14) | 10.6                             |
| 1 – 4 children, ≥30 years           | 4658   | 7.3               | 0.79 (0.61 – 1.02) | 36.7                  | 1.03 (0.85 – 1.25) | 47.9                            | 1.17 (0.98 – 1.39) | 8.1                              |
| ≥5 children, <25 years              | 2149   | 1.4               | 0.20 (0.12 – 0.34) | 14.8                  | 0.40 (0.32 – 0.51) | 65.3                            | 0.94 (0.78 – 1.13) | 18.6                             |
| ≥5 children, ≥25 years              | 184    | 0.5               | 0.10 (0.01 – 0.80) | 27.2                  | 0.81 (0.38 – 1.71) | 62.0                            | 1.29 (0.65 – 2.56) | 10.3                             |
| Age group                           |        |                   |                    |                       |                    |                                 |                    |                                  |
| <40 years                           | 439    | 13.0              | 1.22 (0.70 – 2.13) | 40.3                  | 0.97 (0.61 – 2.13) | 38.3                            | 0.82 (0.53 – 1.27) | 8.4                              |
| 40 – 49 years                       | 8723   | 7.3               | 1.00 (Referent)    | 36.7                  | 1.00 (Referent)    | 46.0                            | 1.00 (Referent)    | 10.0                             |
| 50 – 59 years                       | 13,202 | 4.1               | 0.41 (0.33 – 0.50) | 28.4                  | 0.49 (0.42 – 0.56) | 53.7                            | 0.76 (0.67 – 0.86) | 13.8                             |
| 60 – 69 years                       | 9439   | 2.5               | 0.22 (0.17 – 0.29) | 23.2                  | 0.35 (0.30 – 0.41) | 59.7                            | 0.72 (0.63 – 0.83) | 14.6                             |
| 70+ years                           | 6036   | 2.2               | 0.14 (0.10 – 0.18) | 21.7                  | 0.24 (0.20 – 0.28) | 62.6                            | 0.62 (0.53 – 0.73) | 13.6                             |
| BMI§                                | -      | 22.6 (4.0)        | 0.12 (0.11 – 0.13) | 26.2 (5.3)            | 0.35 (0.34 – 0.36) | 30.7 (7.0)                      | 0.64 (0.63 – 0.66) | 36.8 (8.6)                       |
| BMI at age 18§                      | -      | 19.7 (3.1)        | 0.62 (0.55 – 0.70) | 20.3 (2.9)            | 0.58 (0.54 – 0.61) | 21.8 (4.0)                      | 0.81 (0.77 – 0.84) | 24.1 (5.7)                       |
| Age at menarche                     | -      | 13.1 (1.6)        | 1.06 (1.02 – 1.11) | 12.9 (1.6)            | 1.02 (0.99 – 1.05) | 12.7 (1.7)                      | 1.01 (0.99 – 1.04) | 12.5 (1.7)                       |
| FHOBC¶                              | 6481   | 5.2               | 1.84 (1.55 – 2.20) | 29.5                  | 1.39 (1.24 – 1.56) | 54.2                            | 1.25 (1.13 – 1.39) | 11.1                             |
| Current alcohol use                 | 18069  | 5.4               | 1.21 (1.04 – 1.40) | 32.0                  | 1.13 (1.03 – 1.24) | 52.5                            | 1.07 (0.99 – 1.16) | 10.2                             |
| Oral contraceptive use              |        |                   |                    |                       |                    |                                 |                    |                                  |
| Current                             | 4830   | 7.1               | 1.52 (1.22 – 1.91) | 37.5                  | 1.41 (1.20 – 1.65) | 47.6                            | 1.26 (1.09 – 1.46) | 7.8                              |
| Ever                                | 20530  | 3.9               | 0.98 (0.83 – 1.16) | 27.0                  | 0.99 (0.90 – 1.10) | 55.5                            | 1.04 (0.96 – 1.13) | 13.6                             |
| Never                               | 12479  | 3.7               | 1.00 (Referent)    | 26.2                  | 1.00 (Referent)    | 56.0                            | 1.00 (Referent)    | 14.1                             |
| Post-menopausal status              | 26914  | 2.9               | 0.35 (0.29 – 0.42) | 24.7                  | 0.50 (0.44 – 0.57) | 58.1                            | 0.71 (0.64 – 0.80) | 14.3                             |
| Ever HRT#                           | 8575   | 3.6               | 1.53 (1.18 – 1.99) | 27.8                  | 1.21 (1.06 – 1.39) | 57.4                            | 1.14 (1.01 – 1.28) | 11.3                             |
| Age at menopause  .#                | -      | 48.5 (5.6)        | 1.02 (1.01 – 1.04) | 48.4 (6.0)            | 1.01 (1.00 – 1.02) | 48.3 (6.2)                      | 1.01 (0.99 – 1.02) | 48.0 (6.4)                       |

\*Fully adjusted for all covariates, model includes: race, parity and age at first birth, age group, BMI, BMI at age 18, age at menarche, family history of breast cancer, alcohol use, history of oral contraceptive use, menopausal status. Models among post-menopausal women only further adjusted ever HRT and age at menopause (among post-menopausal women only, N = 26,914). The results from the polytomous logistic regression can be interpreted as the log odds of either extremely dense, heterogeneously dense, or scattered fibroglandular tissue compared to the log odds of almost entirely fatty (the referent mammographic breast density category).

†Number of participants per strata. Not reported and missing are coded as a categorical level: Parity / age at first child's birth (missing = 3,124), BMI (missing = 765), BMI at age 18 (missing = 6,047) family history of breast cancer (missing = 86), alcohol use (missing = 953), menopausal status (missing = 83), and age at menarche (missing = 853).

‡ Presented as proportion within variable strata with breast density category.

§ BMI and BMI at age 18 are interpreted as per 5-unit increase.

|| Continuous variables odds ratios are interpreted as per 1-unit increase.

¶FHOBC = Family history of breast cancer.

#Among post-menopausal women only, N = 26,914. HRT = Hormone replacement therapy.

Supplementary Table 3: Logistic regression for the association between participant characteristics and dense breast\*, among 37,839 women. Presented as odds ratios (ORs) and associated 95% confidence intervals (CIs) for the odds of dense breast. Results using fully conditional specification (FCS) multiple imputation.

| Variable                          | Non-Dense Breast                                    | Dense Breast*                                       | Model 1 <sup>†</sup> |
|-----------------------------------|-----------------------------------------------------|-----------------------------------------------------|----------------------|
|                                   | <i>N</i> (%) = 25,612 (67.7)                        | <i>N</i> (%) = 12,227 (32.3)                        |                      |
|                                   | <i>N</i> (%) <sup>‡</sup> or Mean (SD) <sup>§</sup> | <i>N</i> (%) <sup>‡</sup> or Mean (SD) <sup>§</sup> | OR (95% CI)          |
| <b>Race</b>                       |                                                     |                                                     |                      |
| White (Referent)                  | 14600 (63.0)                                        | 8566 (37.0)                                         | 1.00 (Referent)      |
| African American                  | 11012 (75.1)                                        | 3661 (25.0)                                         | 1.00 (0.95 – 1.06)   |
| <b>Parity/ age at first birth</b> |                                                     |                                                     |                      |
| Nulliparous (Referent)            | 2789 (59.9)                                         | 1871 (40.2)                                         | 1.00 (Referent)      |
| 1 – 4 children, <25 years         | 13484 (72.8)                                        | 5041 (27.2)                                         | 0.67 (0.62 – 0.72)   |
| 1 – 4 children, 25 – 29 years     | 4412 (62.9)                                         | 2597 (37.1)                                         | 0.80 (0.73 – 0.87)   |
| 1 – 4 children, ≥30 years         | 2835 (55.8)                                         | 2248 (44.2)                                         | 0.89 (0.80 – 0.98)   |
| ≥5 children, <25 years            | 1949 (82.7)                                         | 409 (17.4)                                          | 0.44 (0.38 – 0.51)   |
| ≥5 children, ≥25 years            | 143 (70.6)                                          | 59 (29.4)                                           | 0.57 (0.39 – 0.83)   |
| <b>Age group</b>                  |                                                     |                                                     |                      |
| <40 years                         | 205 (46.7)                                          | 234 (53.3)                                          | 1.12 (0.89 – 1.41)   |
| 40 – 49 years (Referent)          | 4886 (56.0)                                         | 3837 (44.0)                                         | 1.00 (Referent)      |
| 50 – 59 years                     | 8910 (67.5)                                         | 4292 (32.5)                                         | 0.64 (0.60 – 0.69)   |
| 60 – 69 years                     | 7017 (74.3)                                         | 2422 (25.7)                                         | 0.46 (0.42 – 0.50)   |
| 70+ years                         | 4594 (76.1)                                         | 1442 (23.9)                                         | 0.35 (0.32 – 0.39)   |
| <b>BMI<sup>  ,¶</sup></b>         |                                                     |                                                     |                      |
| BMI at age 18 <sup>  ,¶</sup>     | 31.82 (7.7)                                         | 25.82 (5.6)                                         | 0.48 (0.47 – 0.50)   |
| Age at menarche <sup>¶</sup>      | 22.20 (4.4)                                         | 20.31 (3.1)                                         | 0.76 (0.72 – 0.80)   |
| Age at menarche <sup>¶</sup>      | 12.61 (1.7)                                         | 12.88 (1.6)                                         | 1.02 (1.01 – 1.12)   |
| <b>FHOBC<sup>#</sup></b>          |                                                     |                                                     |                      |
| Current alcohol use               | 4242 (65.3)                                         | 2256 (34.7)                                         | 1.17 (1.10 – 1.25)   |
| <b>Oral contraceptive use</b>     |                                                     |                                                     |                      |
| Current                           | 11571 (62.6)                                        | 6919 (37.4)                                         | 1.07 (1.01 – 1.12)   |
| Current                           | 2677 (55.4)                                         | 2153 (44.6)                                         | 1.16 (1.07 – 1.26)   |
| Past                              | 14183 (69.1)                                        | 6347 (30.9)                                         | 0.95 (0.90 – 1.00)   |
| Never                             | 8752 (70.1)                                         | 3727 (29.9)                                         | 1.00 (Referent)      |
| <b>Post-menopausal status</b>     |                                                     |                                                     |                      |
| Ever HRT <sup>**</sup>            | 19529 (72.4)                                        | 7451 (27.6)                                         | 0.66 (0.62 – 0.71)   |
| Ever HRT <sup>**</sup>            | 5900 (68.7)                                         | 2692 (31.3)                                         | 1.07 (0.99 – 1.15)   |
| Age at menopause <sup>¶,**</sup>  | 48.17 (6.2)                                         | 48.28 (6.1)                                         | 1.00 (0.99 – 1.01)   |

\* Dense breast defined as BI-RADS 3 and 4. Non-dense breast (referent) defined as BI-RADS 1 and 2. <sup>†</sup>Fully adjusted for all covariates, model includes: race, parity and age at first birth, age, BMI, BMI at age 18, age at menarche, family history of breast cancer, alcohol use, history of oral contraceptive use, menopausal status. <sup>‡</sup>Approximated strata population derived from multiple imputations. <sup>§</sup>Presented as *n* and column proportions or mean and standard deviations. <sup>||</sup>Current BMI and BMI at age 18 odds ratios are interpreted as per 5-unit increase (i.e., for every 5 unit increase in BMI there is an associated odds). <sup>¶</sup>Continuous variables odds ratios are interpreted as per 1-unit increase (i.e., for every 1 year increase in age at menarche there was a 5% increased odds of having dense breast). <sup>#</sup>FHOBC = Family history of breast cancer. <sup>\*\*</sup>Models for age at menopause and HRT are among postmenopausal women only, *N* = 26,980. HRT = Hormone replacement therapy.

Supplementary Table 4: Logistic regression for the association between participant characteristics and the dense breast\*, stratified by race 37,839 women. Presented as odds ratios (ORs) and associated 95% confidence intervals (CIs) for the odds of dense breast. Results using fully conditional specification (FCS) multiple imputation.

| Variable                                           | Non-Dense Breast<br>N (%) = 11,012 | Dense Breast*<br>N (%) = 3,661 | Model 1†           |
|----------------------------------------------------|------------------------------------|--------------------------------|--------------------|
|                                                    | N (%)‡ or<br>Mean (SD)§            | N (%)‡ or<br>Mean (SD)§        | OR (95% CI)        |
| <b>Among African American Women (N = 14,673)</b>   |                                    |                                |                    |
| Parity/ age at first birth                         |                                    |                                |                    |
| Nulliparous (Referent)                             | 963 (68.5)                         | 442 (31.5)                     | 1.00 (Referent)    |
| 1 – 4 children, <25 years                          | 6805 (76.1)                        | 2134 (23.9)                    | 0.70 (0.60 – 0.80) |
| 1 – 4 children, 25 – 29 years                      | 1148 (69.4)                        | 508 (30.7)                     | 0.94 (0.79 – 1.12) |
| 1 – 4 children, ≥30 years                          | 680 (67.7)                         | 324 (32.3)                     | 0.94 (0.77 – 1.15) |
| ≥5 children, <25 years                             | 1377 (84.8)                        | 1237 (15.2)                    | 0.44 (0.36 – 0.55) |
| ≥5 children, ≥25 years                             | 37 (87.3)                          | 5 (12.7)                       | 0.31 (0.09 – 1.05) |
| Age group                                          |                                    |                                |                    |
| <40 years                                          | 79 (59.4)                          | 54 (40.6)                      | 1.16 (0.78 – 1.74) |
| 40 – 49 years (Referent)                           | 2457 (65.2)                        | 1313 (34.8)                    | 1.00 (Referent)    |
| 50 – 59 years                                      | 4023 (76.1)                        | 1266 (23.9)                    | 0.56 (0.50 – 0.63) |
| 60 – 69 years                                      | 2751 (80.7)                        | 658 (19.3)                     | 0.43 (0.37 – 0.49) |
| 70+ years                                          | 1702 (82.1)                        | 370 (17.9)                     | 0.31 (0.26 – 0.37) |
| BMI  ¶                                             | 33.88 (7.9)                        | 28.08 (5.9)                    | 0.52 (0.50 – 0.54) |
| BMI at age 18  ·¶                                  | 22.64 (4.9)                        | 20.71 (3.8)                    | 0.81 (0.74 – 0.89) |
| Age at menarche¶                                   | 12.59 (1.8)                        | 12.80 (1.8)                    | 1.01 (0.99 – 1.04) |
| FHOBC#                                             | 1640 (73.6)                        | 587 (26.4)                     | 1.18 (1.05 – 1.33) |
| Current alcohol use                                | 3893 (72.7)                        | 1463 (27.3)                    | 1.18 (1.05 – 1.33) |
| Oral contraceptive use                             |                                    |                                | 0.96 (0.88 – 1.05) |
| Current                                            | 671 (65.7)                         | 351 (34.3)                     | 1.16 (0.98 – 1.37) |
| Past                                               | 6360 (75.2)                        | 2103 (24.9)                    | 1.02 (0.93 – 1.11) |
| Never                                              | 3981 (76.7)                        | 1207 (23.3)                    | 1.00 (Referent)    |
| Post-menopausal status                             | 8105 (78.6)                        | 2205 (21.4)                    | 0.73 (0.65 – 0.82) |
| Ever HRT**                                         | 1588 (78.1)                        | 445 (21.9)                     | 0.96 (0.83 – 1.11) |
| Age at menopause¶.**                               | 47.56 (6.4)                        | 47.17 (6.6)                    | 0.99 (0.98 – 1.01) |
| <b>Among Non-Hispanic White Women (N = 23,166)</b> |                                    |                                |                    |
|                                                    | Non-Dense Breast<br>N (%) = 14,600 | Dense Breast*<br>N (%) = 8,566 |                    |
| Parity/ age at first birth                         |                                    |                                |                    |
| Nulliparous (Referent)                             | 1825 (56.1)                        | 1429 (43.9)                    | 1.00 (Referent)    |
| 1 – 4 children, <25 years                          | 6679 (69.7)                        | 2907 (30.3)                    | 0.66 (0.57 – 0.68) |
| 1 – 4 children, 25 – 29 years                      | 3263 (61.0)                        | 2090 (39.0)                    | 0.66 (0.60 – 0.73) |
| 1 – 4 children, ≥30 years                          | 2155 (52.8)                        | 1924 (47.2)                    | 0.87 (0.77 – 0.97) |
| ≥5 children, <25 years                             | 572 (77.9)                         | 162 (22.1)                     | 0.48 (0.38 – 0.59) |
| ≥5 children, ≥25 years                             | 106 (66.2)                         | 54 (33.8)                      | 0.61 (0.42 – 0.91) |
| Age group                                          |                                    |                                |                    |
| <40 years                                          | 126 (41.2)                         | 180 (58.8)                     | 1.12 (0.85 – 1.48) |
| 40 – 49 years (Referent)                           | 2429 (49.0)                        | 2524 (51.0)                    | 1.00 (Referent)    |
| 50 – 59 years                                      | 4887 (61.8)                        | 3026 (38.2)                    | 0.70 (0.64 – 0.77) |

|                                   |              |              |                    |
|-----------------------------------|--------------|--------------|--------------------|
| 60 – 69 years                     | 4266 (70.8)  | 1764 (29.3)  | 0.49 (0.44 – 0.54) |
| 70+ years                         | 2892 (73.0)  | 1072 (27.0)  | 0.37 (0.33 – 0.42) |
| BMI <sup>  ,¶</sup>               | 30.27 (7.2)  | 24.86 (4.8)  | 0.46 (0.44 – 0.48) |
| BMI at age 18 <sup>  ,¶</sup>     | 21.87 (4.0)  | 20.14 (2.7)  | 0.71 (0.67 – 0.76) |
| Age at menarche <sup>¶</sup>      | 12.63 (1.5)  | 12.91 (1.5)  | 1.03 (1.01 – 1.05) |
| FHOBC <sup>#</sup>                | 2602 (60.9)  | 1669 (39.1)  | 1.16 (1.07 – 1.26) |
| Current alcohol use               | 7678 (58.5)  | 27277 (41.5) | 1.12 (1.05 – 1.19) |
| Oral contraceptive use            |              |              |                    |
| Current                           | 2006 (52.7)  | 1802 (47.3)  | 1.13 (1.03 – 1.24) |
| Past                              | 7823 (64.8)  | 4244 (35.2)  | 0.91 (0.85 – 0.98) |
| Never                             | 4771 (65.4)  | 2520 (34.6)  | 1.00 (Referent)    |
| Post-menopausal status            | 11423 (68.5) | 5246 (31.5)  | 0.62 (0.57 – 0.68) |
| Ever HRT <sup>**</sup>            | 4312 (65.7)  | 2247 (34.4)  | 1.11 (1.01 – 1.21) |
| Age at menopause <sup>¶, **</sup> | 48.60 (6.0)  | 48.75 (5.7)  | 1.01 (0.99 – 1.02) |

\* Dense breast defined as BI-RADS 3 and 4. Non-dense breast (referent) defined as BI-RADS 1 and 2.

†Fully adjusted for all covariates, model includes: age at first birth, age, BMI, age at menarche, family history of breast cancer, alcohol use, history of oral contraceptive use, menopausal status.

‡ Approximated strata population derived from multiple imputations.

§ Presented as n and column proportions or mean and standard deviations.

|| Current BMI and BMI at age 18 odds ratios are interpreted as per 5-unit increase (i.e., for every 5 unit increase in BMI there is an associated odds).

¶ All continuous variables odds ratios are interpreted as per 1-unit increase (i.e., for every 1 year increase in age at menarche there was a 3% increased odds of having dense breast).

#FHOBC = Family history of breast cancer

\*\*Models for age at menopause and HRT are among postmenopausal women only (African American Women  $N = 10,310$ ; Non-Hispanic White Women  $N = 16,669$ ). HRT = Hormone replacement therapy.

Supplementary Table 4: Multivariable polytomous logistic regression\* for the association of participant characteristics with mammographic density (referent outcome is almost entirely fatty), among 37,839 women. Model performed with covariates with missing categorized.

| Variable                                   | No.†   | Extremely Dense   |                    | Heterogeneously Dense |                    | Scattered Fibroglandular Tissue |                    | Almost Entirely Fatty (Referent) |
|--------------------------------------------|--------|-------------------|--------------------|-----------------------|--------------------|---------------------------------|--------------------|----------------------------------|
|                                            |        | (%‡) or Mean (SD) | OR (95% CI)        | (%‡) or Mean (SD)     | OR (95% CI)        | (%‡) or Mean (SD)               | OR (95% CI)        | (%‡) or Mean (SD)                |
| (%)                                        |        | 1597 (4.2)        |                    | 10,630 (29.1)         |                    | 20,686 (54.7)                   |                    | 4926 (13.0)                      |
| <b>Race</b>                                |        |                   |                    |                       |                    |                                 |                    |                                  |
| White                                      | 23166  | 5.0               | 1.00 (Referent)    | 31.9                  | 1.00 (Referent)    | 52.7                            | 1.00 (Referent)    | 10.3                             |
| African American                           | 14673  | 2.9               | 1.26 (1.07 – 1.49) | 22.0                  | 0.91 (0.83 – 0.99) | 57.8                            | 0.89 (0.82 – 0.96) | 17.3                             |
| <b>Parity / age at first child's birth</b> |        |                   |                    |                       |                    |                                 |                    |                                  |
| Nulliparous                                | 4243   | 7.1               | 1.00 (Referent)    | 33.4                  | 1.00 (Referent)    | 47.1                            | 1.00 (Referent)    | 12.4                             |
| 1 – 4 children, <25 years                  | 17,043 | 2.6               | 0.38 (0.31 – 0.48) | 23.9                  | 0.63 (0.55 – 0.73) | 58.8                            | 0.93 (0.81 – 1.06) | 14.7                             |
| 1 – 4 children, 25 – 29 years              | 6438   | 4.5               | 0.52 (0.41 – 0.66) | 32.1                  | 0.81 (0.68 – 0.95) | 52.9                            | 0.98 (0.84 – 1.14) | 10.6                             |
| 1 – 4 children, ≥30 years                  | 4658   | 7.3               | 0.79 (0.61 – 1.02) | 36.7                  | 1.03 (0.85 – 1.25) | 47.9                            | 1.17 (0.98 – 1.39) | 8.1                              |
| ≥5 children, <25 years                     | 2149   | 1.4               | 0.20 (0.12 – 0.34) | 14.8                  | 0.40 (0.32 – 0.51) | 65.3                            | 0.94 (0.78 – 1.13) | 18.6                             |
| ≥5 children, ≥25 years                     | 184    | 0.5               | 0.10 (0.01 – 0.80) | 27.2                  | 0.81 (0.38 – 1.71) | 62.0                            | 1.29 (0.65 – 2.56) | 10.3                             |
| <b>Age group</b>                           |        |                   |                    |                       |                    |                                 |                    |                                  |
| <40 years                                  | 439    | 13.0              | 1.22 (0.70 – 2.13) | 40.3                  | 0.97 (0.61 – 2.13) | 38.3                            | 0.82 (0.53 – 1.27) | 8.4                              |
| 40 – 49 years                              | 8723   | 7.3               | 1.00 (Referent)    | 36.7                  | 1.00 (Referent)    | 46.0                            | 1.00 (Referent)    | 10.0                             |
| 50 – 59 years                              | 13,202 | 4.1               | 0.41 (0.33 – 0.50) | 28.4                  | 0.49 (0.42 – 0.56) | 53.7                            | 0.76 (0.67 – 0.86) | 13.8                             |
| 60 – 69 years                              | 9439   | 2.5               | 0.22 (0.17 – 0.29) | 23.2                  | 0.35 (0.30 – 0.41) | 59.7                            | 0.72 (0.63 – 0.83) | 14.6                             |
| 70+ years                                  | 6036   | 2.2               | 0.14 (0.10 – 0.18) | 21.7                  | 0.24 (0.20 – 0.28) | 62.6                            | 0.62 (0.53 – 0.73) | 13.6                             |
| BMI§                                       | -      | 22.6 (4.0)        | 0.12 (0.11 – 0.13) | 26.2 (5.3)            | 0.35 (0.34 – 0.36) | 30.7 (7.0)                      | 0.64 (0.63 – 0.66) | 36.8 (8.6)                       |
| BMI at age 18§                             | -      | 19.7 (3.1)        | 0.62 (0.55 – 0.70) | 20.3 (2.9)            | 0.58 (0.54 – 0.61) | 21.8 (4.0)                      | 0.81 (0.77 – 0.84) | 24.1 (5.7)                       |
| Age at menarche                            | -      | 13.1 (1.6)        | 1.06 (1.02 – 1.11) | 12.9 (1.6)            | 1.02 (0.99 – 1.05) | 12.7 (1.7)                      | 1.01 (0.99 – 1.04) | 12.5 (1.7)                       |
| FHOBC¶                                     | 6481   | 5.2               | 1.84 (1.55 – 2.20) | 29.5                  | 1.39 (1.24 – 1.56) | 54.2                            | 1.25 (1.13 – 1.39) | 11.1                             |
| Current alcohol use                        | 18069  | 5.4               | 1.21 (1.04 – 1.40) | 32.0                  | 1.13 (1.03 – 1.24) | 52.5                            | 1.07 (0.99 – 1.16) | 10.2                             |
| <b>Oral contraceptive use</b>              |        |                   |                    |                       |                    |                                 |                    |                                  |
| Current                                    | 4830   | 7.1               | 1.52 (1.22 – 1.91) | 37.5                  | 1.41 (1.20 – 1.65) | 47.6                            | 1.26 (1.09 – 1.46) | 7.8                              |
| Ever                                       | 20530  | 3.9               | 0.98 (0.83 – 1.16) | 27.0                  | 0.99 (0.90 – 1.10) | 55.5                            | 1.04 (0.96 – 1.13) | 13.6                             |
| Never                                      | 12479  | 3.7               | 1.00 (Referent)    | 26.2                  | 1.00 (Referent)    | 56.0                            | 1.00 (Referent)    | 14.1                             |
| Post-menopausal status                     | 26914  | 2.9               | 0.35 (0.29 – 0.42) | 24.7                  | 0.50 (0.44 – 0.57) | 58.1                            | 0.71 (0.64 – 0.80) | 14.3                             |
| Ever HRT#                                  | 8575   | 3.6               | 1.53 (1.18 – 1.99) | 27.8                  | 1.21 (1.06 – 1.39) | 57.4                            | 1.14 (1.01 – 1.28) | 11.3                             |
| Age at menopause  .#                       | -      | 48.5 (5.6)        | 1.02 (1.01 – 1.04) | 48.4 (6.0)            | 1.01 (1.00 – 1.02) | 48.3 (6.2)                      | 1.01 (0.99 – 1.02) | 48.0 (6.4)                       |

\*The results from the polytomous logistic regression can be interpreted as the log odds of either extremely dense, heterogeneously dense, or scattered fibroglandular tissue compared to the log odds of almost entirely fatty (the referent mammographic breast density category). Models are fully adjusted for all covariates, model includes: race, parity and age at first birth, age group, BMI, BMI at age 18, age at menarche, family history of breast cancer, alcohol use, history of oral contraceptive use, menopausal status. Models among post-menopausal women only further adjusted ever HRT and age at menopause (among post-menopausal women only, N = 26,914).

† N (%) – represents the total number of participants within strata and proportion of total population. Not reported and missing are coded as a categorical level: Parity / age at first child's birth (missing = 3,124), BMI (missing = 765), BMI at age 18 (missing = 6,047) family history of breast cancer (missing = 86), alcohol use (missing = 953), menopausal status (missing = 83), and age at menarche (missing = 853).

‡ Presented as proportion within variable strata with breast density category.

§ BMI and BMI at age 18 are interpreted as per 5-unit increase.

|| Continuous variables odds ratios are interpreted as per 1-unit increase.

¶ FHOBC = Family history of breast cancer.

---

<sup>#</sup> Among post-menopausal women only, N = 26,914. HRT = Hormone replacement therapy.

---
